# Supplementary material for: Evaluation of the cytotoxicity of the Bithionol - cisplatin combination in a panel of human ovarian cancer cell lines
Source: Springer Nature journal article supplement (doi:10.1186/s12885-016-3034-2), 2017-01-13
Supplement: MOESM1 [file 11998338]

## **ADDITIONAL FILE**

### **BT-cisplatin combination-induced cytotoxicity profiles on ovarian cancer cell lines.**

#### ***OVCA-3***

BT was antagonistic to cisplatin action when cells were pretreated with BT followed by cisplatin addition (Fig. S1A). However, when BT and cisplatin were added simultaneously, a synergistic effect, highly dependent on drug concentrations was observed. When tested using a non-constant ratio or a constant ratio approach, synergy was observed near the  $IC_{50}$  concentration of BT (50  $\mu$ M) when combined with lower concentrations of cisplatin (1.56 – 25  $\mu$ M). At lower concentrations of BT (3.25  $\mu$ M), a small additive effect was observed at lower cisplatin concentrations (3.13 – 50  $\mu$ M). As shown in Fig. S1B, at synergistic drug ratios, combination with 50  $\mu$ M BT enhanced the cytotoxic potential of cisplatin by almost 20 to 77% at lower cisplatin concentrations (1.56 – 12.5  $\mu$ M). In summary, these results show that BT and cisplatin are in general antagonistic, however, these agents are synergistic within a very narrow range of ratios, with a slightly better response when both drugs are added simultaneously.

#### ***SKOV-3***

When SKOV-3 cells were pretreated with BT followed by cisplatin, synergy was observed at low BT and cisplatin concentrations (3.25  $\mu$ M and 1.56-6.25  $\mu$ M, respectively) while all other concentrations resulted in antagonistic BT-cisplatin interactions (Fig. S1C). However, simultaneous addition of BT with cisplatin resulted in synergy, which was highly dependent on the concentrations of both drugs. Synergy was observed near the  $IC_{50}$  concentration of BT when combined with cisplatin at concentrations between 1.56 and 12.5  $\mu$ M. At other concentrations of BT (3.25 – 25  $\mu$ M), a synergistic effect was observed only at low cisplatin concentration (1.56  $\mu$ M). As shown in Fig. S1D, at synergistic drug ratios, combination with 50  $\mu$ M BT enhanced the cytotoxic potential of cisplatin by almost 30 to 70% at lower cisplatin concentrations (1.56 – 12.5  $\mu$ M). Thus, BT and cisplatin act in general antagonistic, however, synergy was observed at very narrow drugs ratios with slightly better response when both drugs were added simultaneously.

# Figure S1

(A)

## OVCAR-3

24Hr pretreatment with BT followed by Cisplatin (Non-Constant Ratio)

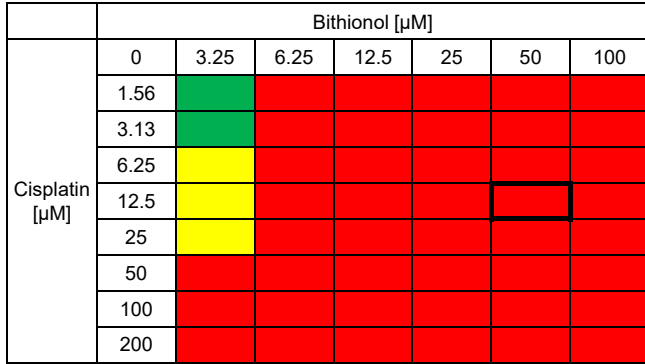

Simultaneous treatment with BT and Cisplatin (Non-Constant Ratio)

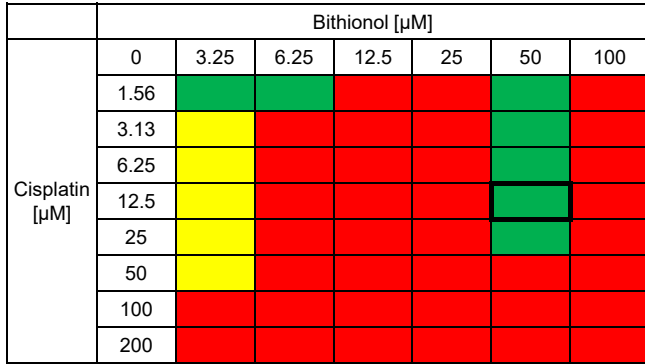

Simultaneous treatment with BT and Cisplatin (Constant Ratio)

| BT [ $\mu\text{M}$ ]  | 3.125     | 6.25       | 12.5       | 25         | 50        | 100        | 200        | 400        |
|-----------------------|-----------|------------|------------|------------|-----------|------------|------------|------------|
| Cis [ $\mu\text{M}$ ] | 1.56      | 3.13       | 6.25       | 12.5       | 25        | 50         | 100        | 200        |
| CI                    | Synergism | Antagonism | Antagonism | Antagonism | Synergism | Antagonism | Antagonism | Antagonism |

Antagonism ( $C > 1$ ) Additive effect ( $C = 0.9-1$ ) Synergism ( $C < 0.9$ )

(C)

## SKOV-3

24Hr pretreatment with BT followed by Cisplatin (Non-Constant Ratio)

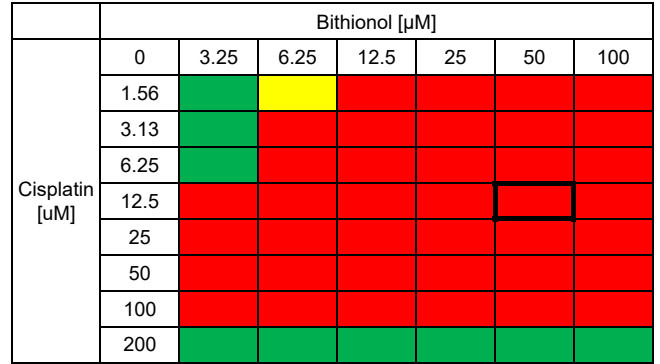

Simultaneous treatment with BT and Cisplatin (Non-Constant Ratio)

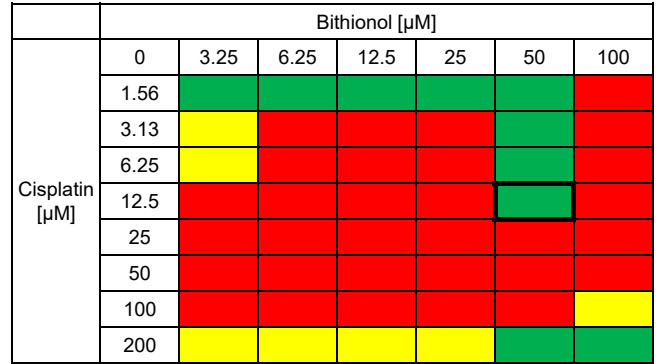

Simultaneous treatment with BT and Cisplatin (Constant Ratio)

| BT [ $\mu\text{M}$ ]  | 3.125     | 6.25       | 12.5       | 25         | 50         | 100        | 200        | 400        |
|-----------------------|-----------|------------|------------|------------|------------|------------|------------|------------|
| Cis [ $\mu\text{M}$ ] | 1.56      | 3.13       | 6.25       | 12.5       | 25         | 50         | 100        | 200        |
| CI                    | Synergism | Antagonism | Antagonism | Antagonism | Antagonism | Antagonism | Antagonism | Antagonism |

(B)

## OVCAR-3

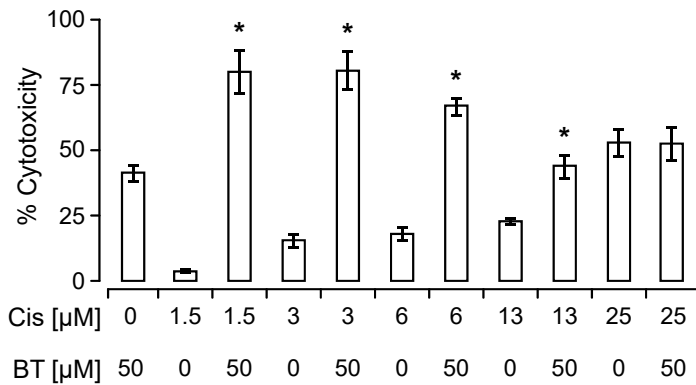

(D)

## SKOV-3

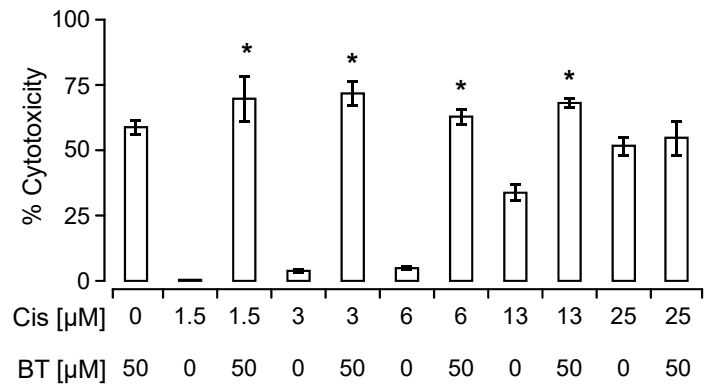

**Figure S1: Evaluation of the cytotoxic potential of BT-cisplatin combination against the ovarian cancer cell lines OVCAR-3 and SKOV-3.** After determining viability (PrestoBlue assay) of cells treated with combinations of BT and cisplatin, combination index (CI) values were calculated and represented as heat maps where a drug combination is synergistic (green color) if  $CI < 0.9$ ; additive (yellow color) if CI is between 0.9 and 1.0; and antagonistic (red color) if  $CI > 1.0$ . CI values of OVCAR-3 and SKOV-3 are shown in **(A)** and **(C)** respectively. **(B and D)** % cytotoxicity induced BT/cisplatin combination at synergistic ratios of OVCAR-3 and SKOV-3 respectively. Percent cytotoxicity induced by BT/cisplatin combination at synergistic ratios for OVCAR-3 **(B)** and SKOV-3 **(D)** are shown in bar graphs. Comparisons between cisplatin alone-treated and combination-treated for each cell line were performed by Student's t-test. All data were expressed as mean  $\pm$  SD of triplicate experiments. The significance level was set at  $p < 0.05$  as indicated by asterisk (\*). Human ovarian carcinoma cell lines, OVCAR-3, SKOV-3 were provided by Dr. McAsey (SIU School of Medicine, Springfield, IL). The significance level was set at  $p < 0.05$  as indicated by asterisks (\*).
